# Supplementary material for: Synthesis, spectral characterization and crystal structures of organophosphonic diamides: pyramidal nitrogen centers and hydrogen bonding in [PhP(O)(NHtBu)2], [PhP(O)(NHDipp)2] (Dipp = 2,6-iPr2C6H3) and [tBuP(O)(NHiPr)2]
Source: Royal Society of Chemistry journal article supplement (doi:10.1039/b300035d), 2003-01-01
Supplement: b300035d.pdf [file b300035d.pdf]

Supporting Information for Synthesis, Spectral Characterization, and Crystal Structures of Organophosphonic Diamides: Pyramidal Nitrogen Centers and Hydrogen Bonding in  $[\text{PhP}(\text{O})(\text{NH}^t\text{Bu})_2]$ ,  $[\text{PhP}(\text{O})(\text{NHDipp})_2]$  (Dipp = 2,6- $^i\text{Pr}_2\text{C}_6\text{H}_3$ ) and  $[\text{}^t\text{BuP}(\text{O})(\text{NH}^i\text{Pr})_2]$

Ramaswamy Murugavel\* and Ramasamy Pothiraja

B300035D

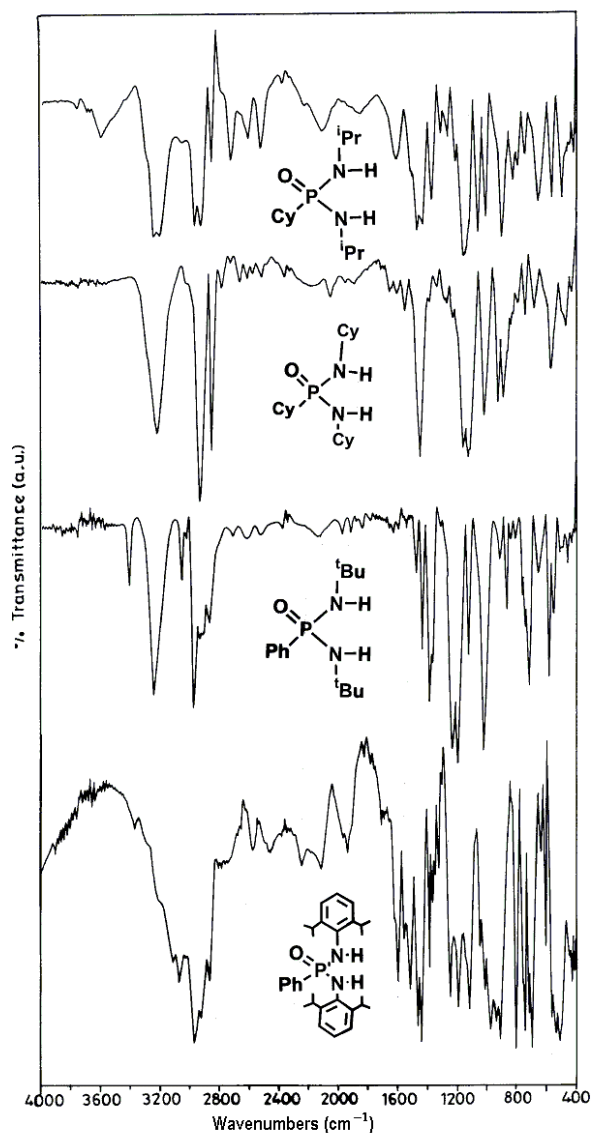

Figure S1. Representative IR spectra of phosphonic diamides (KBr discs)

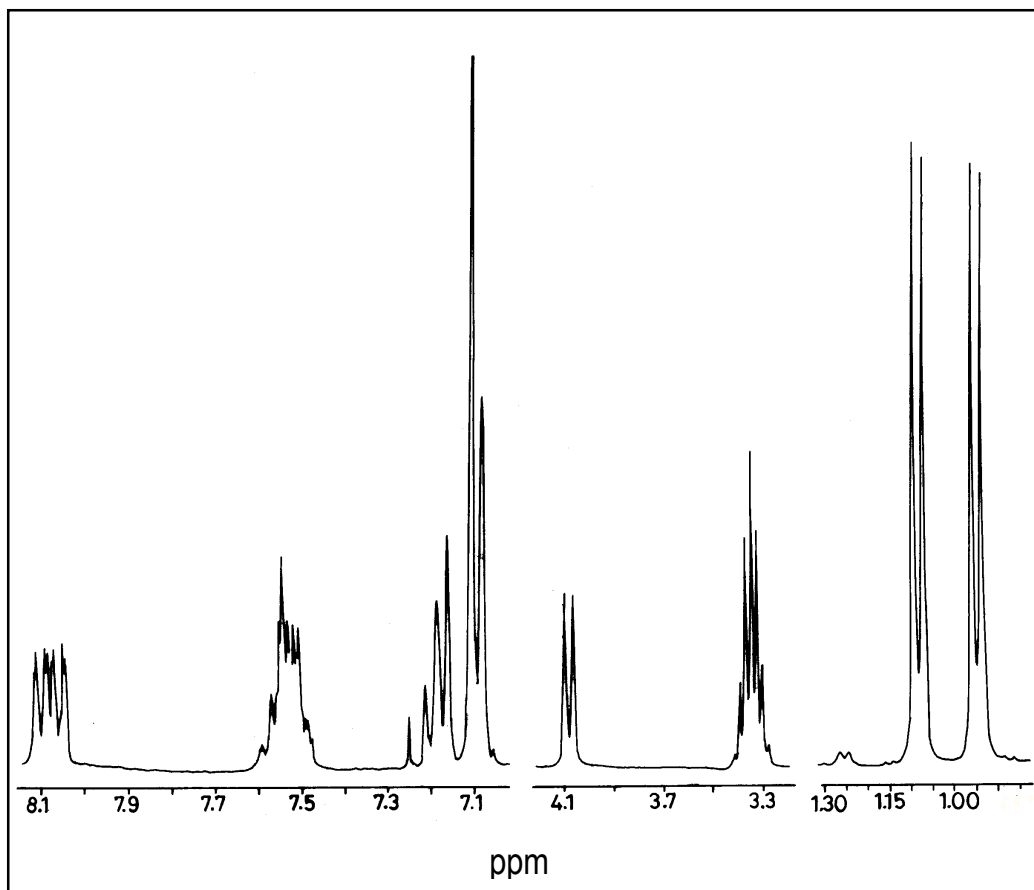

Figure S2. <sup>1</sup>H NMR spectrum of [PhP(O)(NHDipp)<sub>2</sub>] (**2**) in CDCl<sub>3</sub>.
